# Supplementary material
Source: publisher figshare collection journal article supplement (https://acs.figshare.com/ndownloader/files/14979716)
Supplement: Supplementary file 1 [file 14979716]

## *Supporting Information*

# **Double in situ Preparation of Raspberry-like Polymer Particles**

Jiawei Li,<sup>a,b</sup> Susanne Sihler,<sup>b</sup> Ulrich Ziener<sup>b\*</sup>

<sup>a</sup>Engineering Research Center for Eco-Dyeing & Finishing of Textiles, Ministry of Education, Zhejiang  
Sci-Tech University, Hangzhou 310018, P. R. China

<sup>b</sup>Institute of Organic Chemistry III – Macromolecular Chemistry and Organic Materials, University of  
Ulm, Albert-Einstein-Allee 11, 89081 Ulm, Germany

\* Corresponding author: [ulrich.ziener@uni-ulm.de](mailto:ulrich.ziener@uni-ulm.de).

## List of Contents

|                                                                                                                                                                                                                      |    |
|----------------------------------------------------------------------------------------------------------------------------------------------------------------------------------------------------------------------|----|
| Table S1. Summary of formulations, particle sizes and PDIs for the PSt-SiO <sub>2</sub> NCPs prepared by the postpolymerization method                                                                               | S3 |
| Figure S1. Size distribution of raspberry-like PSt-SiO <sub>2</sub> NCPs determined by DLS (see Table 1, runs 2 and 4)                                                                                               | S4 |
| Figure S2. TEM images of the as-obtained PSt-SiO <sub>2</sub> NCPs using SDS as stabilizer                                                                                                                           | S4 |
| Figure S3. (a) TEM image and (b) DLS size distribution of PSt-SiO <sub>2</sub> NCPs (see Table 1, run 12)                                                                                                            | S5 |
| Figure S4. TEM image of the dried emulsion from run S2 (see Table S1) after the formation of SiO <sub>2</sub> nanoparticles for 3 d at room temperature (RT) before the polymerization                               | S5 |
| Figure S5. TEM images of the PSt-SiO <sub>2</sub> NCPs prepared by the postpolymerization method with different mass ratios St/TEOS and amounts of 4-VP                                                              | S6 |
| Figure S6. DLS size distribution of PSt-SiO <sub>2</sub> NCPs (see Table S1, run S5)                                                                                                                                 | S7 |
| Figure S7. TEM micrograph (a) and EDX element mappings of C (b) and Si (c) of PSt-SiO <sub>2</sub> NCPs at a polymerization time of 5 h with an initial ratio of St/TEOS of 70/30 and 25 mg of 4-VP (Table 1, run 2) | S7 |
| Figure S8. TEM images of SiO <sub>2</sub> particles after different times of the sol-gel process from emulsions with TEOS and toluene as dispersed phase                                                             | S8 |

**Table S1.** Summary of formulations, particle sizes and PDIs for the PSt-SiO<sub>2</sub> NCPs prepared by the postpolymerization method using the waterborne initiator (V-057) and Eosin Y as stabilizer (2 mg/mL).

| Runs            | St/g | TEOS/g | 4-VP/mg <sup>a</sup> | HD/mg | Initiator/mg | Reaction conditions                    | z-Diameter/nm ( $D_z$ ) <sup>b</sup> | Polydispersity (PDI) <sup>b</sup> |
|-----------------|------|--------|----------------------|-------|--------------|----------------------------------------|--------------------------------------|-----------------------------------|
| S1 <sup>c</sup> | 2    | 0      | 0                    | 80    | 80           | 60 °C, 5h                              | 239                                  | 0.083                             |
| S2              | 0.45 | 0.05   | 50                   | 20    | 20           | RT, pH 9, 3 d; <sup>d</sup> 60 °C, 5 h | 114                                  | 0.042                             |
| S3              | 0.45 | 0.05   | 75                   | 20    | 20           | RT, pH 9, 3 d; <sup>d</sup> 60 °C, 5 h | 148                                  | 0.028                             |
| S4              | 0.4  | 0.1    | 75                   | 20    | 20           | RT, pH 9, 3 d; <sup>d</sup> 60 °C, 5 h | 157                                  | 0.136                             |
| S5              | 0.35 | 0.15   | 75                   | 20    | 20           | RT, pH 9, 3 d; <sup>d</sup> 60 °C, 5 h | 132                                  | 0.098                             |

<sup>a</sup> After the formation of SiO<sub>2</sub> nanoparticles for 3 d at room temperature (RT), a certain mass fraction of 4-VP was added into the emulsion.

<sup>b</sup> Determined by DLS.

<sup>c</sup> The monomer concentration is 20 wt%.

<sup>d</sup> In a 0.01 M NH<sub>3</sub>\*NH<sub>4</sub>Cl buffered aqueous solution at pH = 9.

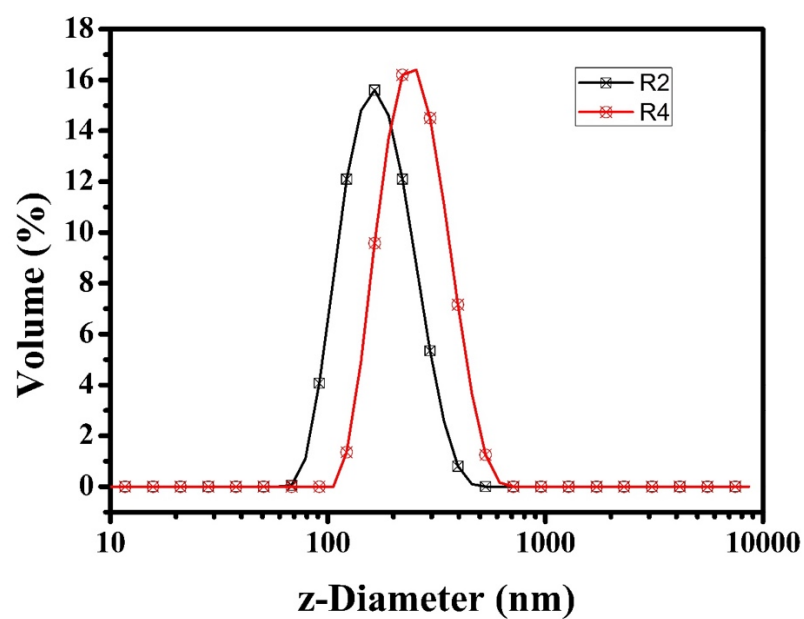

**Figure S1.** DLS size distribution of raspberry-like PSt-SiO<sub>2</sub> NCPs (see Table 1, runs 2 and 4).

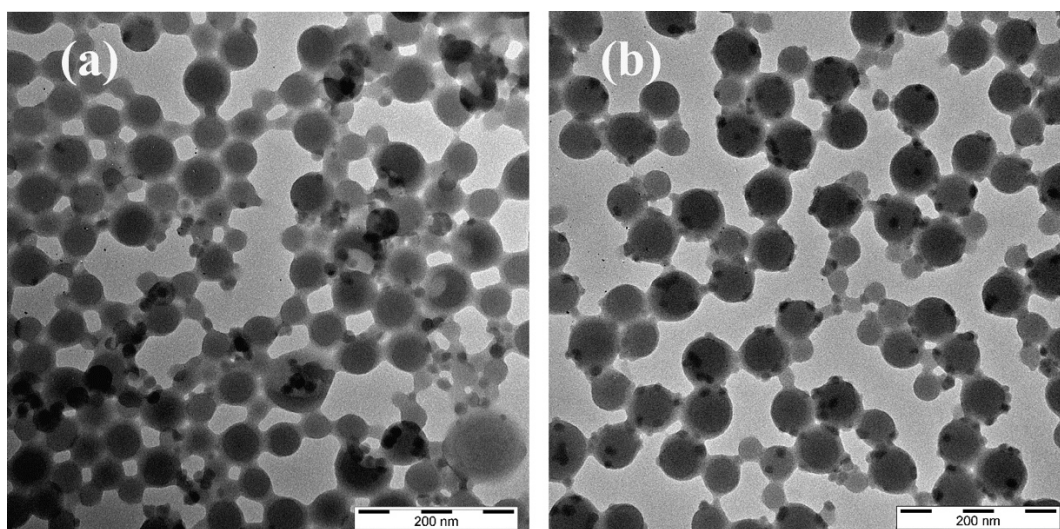

**Figure S2.** TEM images of the as-obtained PSt-SiO<sub>2</sub> NCPs prepared using SDS as stabilizer (see Table 1, runs 9 and 10).

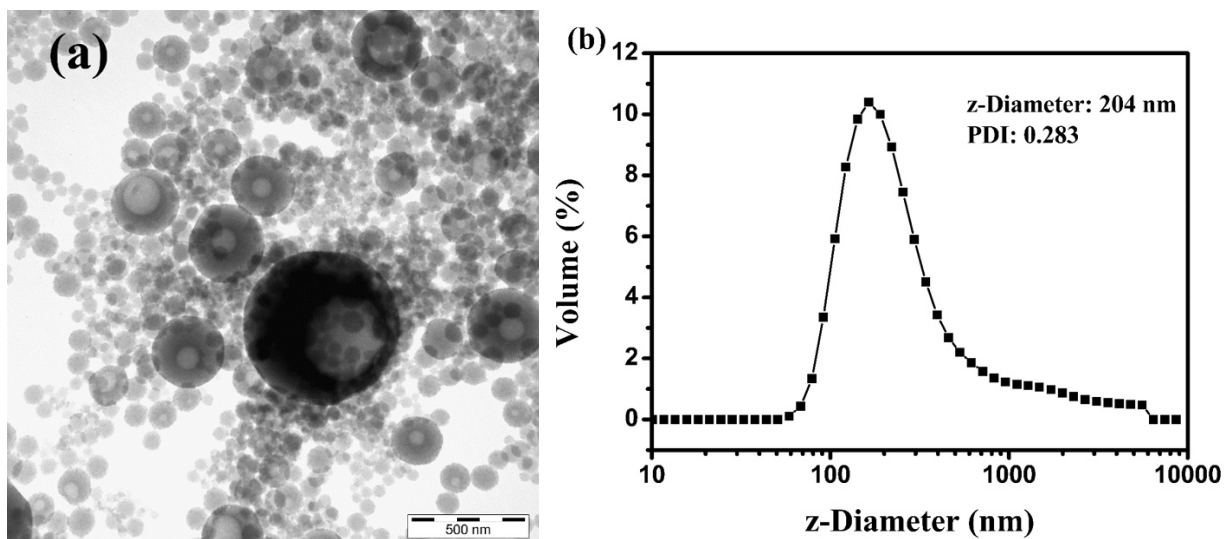

**Figure S3.** (a) TEM image and (b) DLS size distribution of PSt-SiO<sub>2</sub> NCPs (see Table 1, run 12).

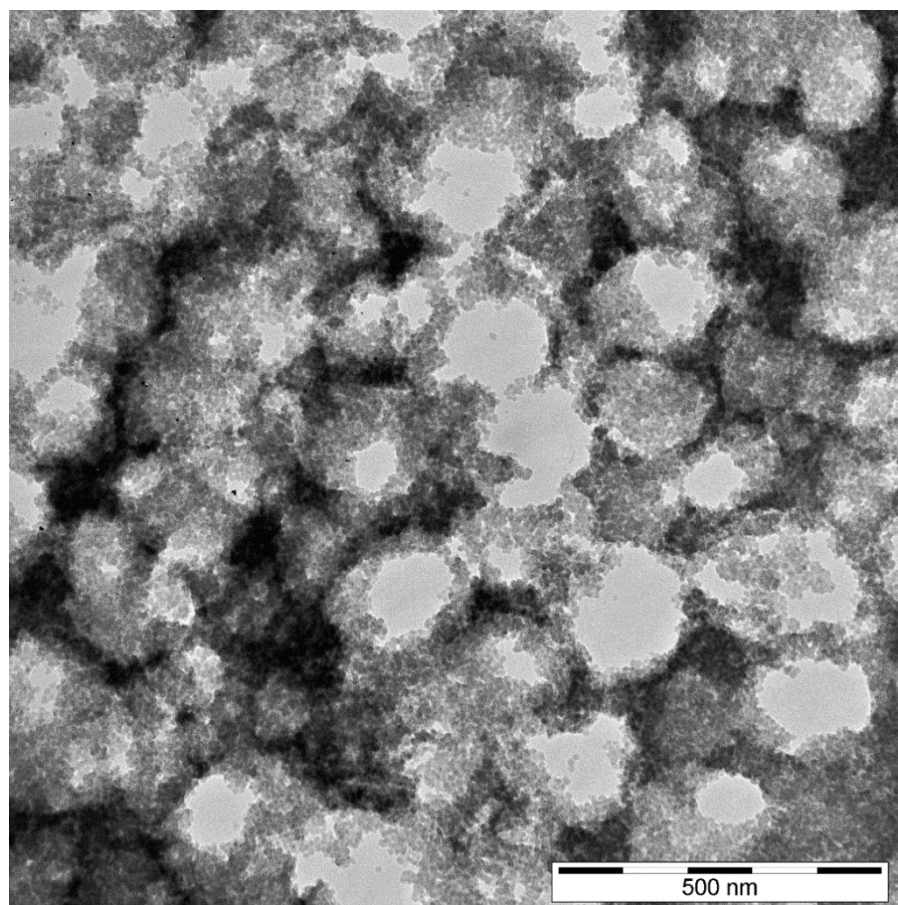

**Figure S4.** TEM image of the dried emulsion from run S2 (see Table S1) after the formation of SiO<sub>2</sub> nanoparticles for 3 d at room temperature (RT) before the polymerization.

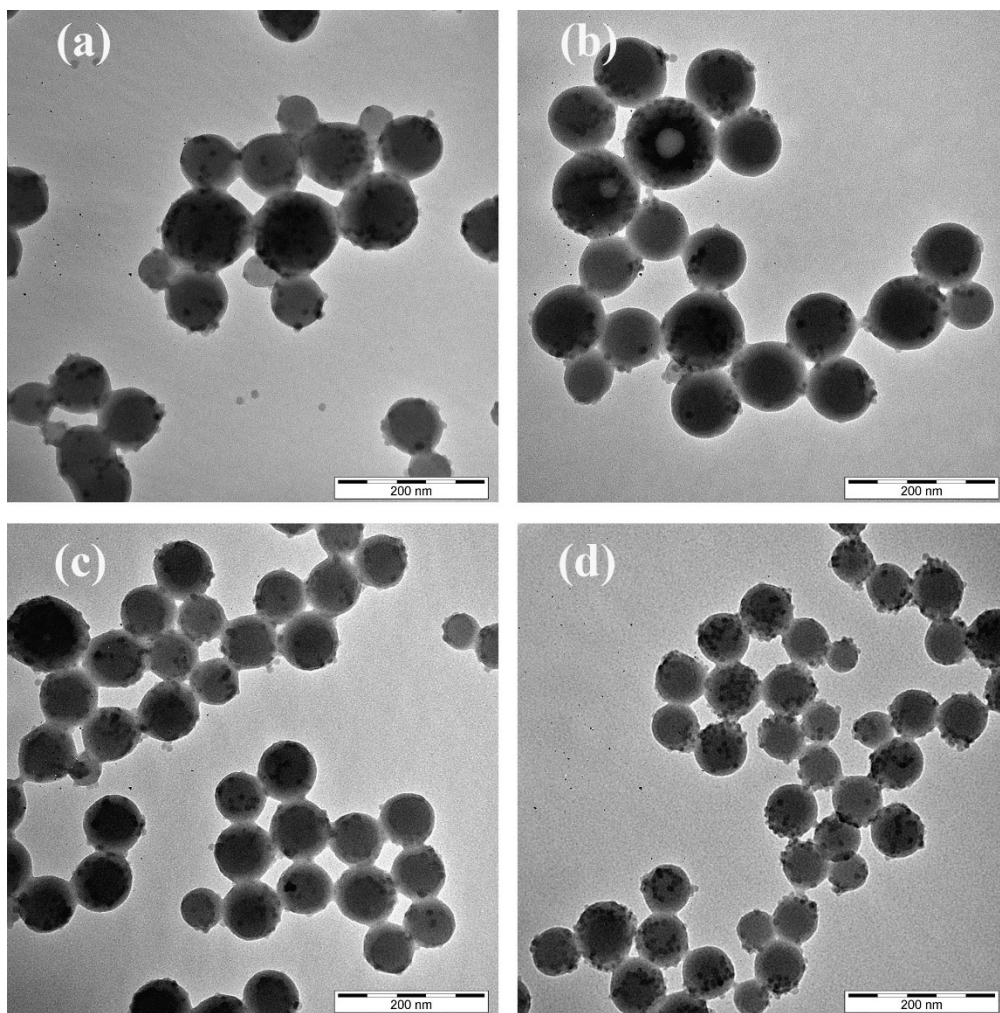

**Figure S5.** TEM images of the PSt-SiO<sub>2</sub> NCPs prepared by the postpolymerization method with different mass ratios St/TEOS and amounts of 4-VP: (a) 90/10 St/TEOS, 50 mg of 4-VP, (b) 90/10 St/TEOS, 75 mg of 4-VP, (c) 80/20 St/TEOS, 75 mg of 4-VP and (d) 70/30 St/TEOS, 75 mg of 4-VP (see Table S1, runs S2-S5).

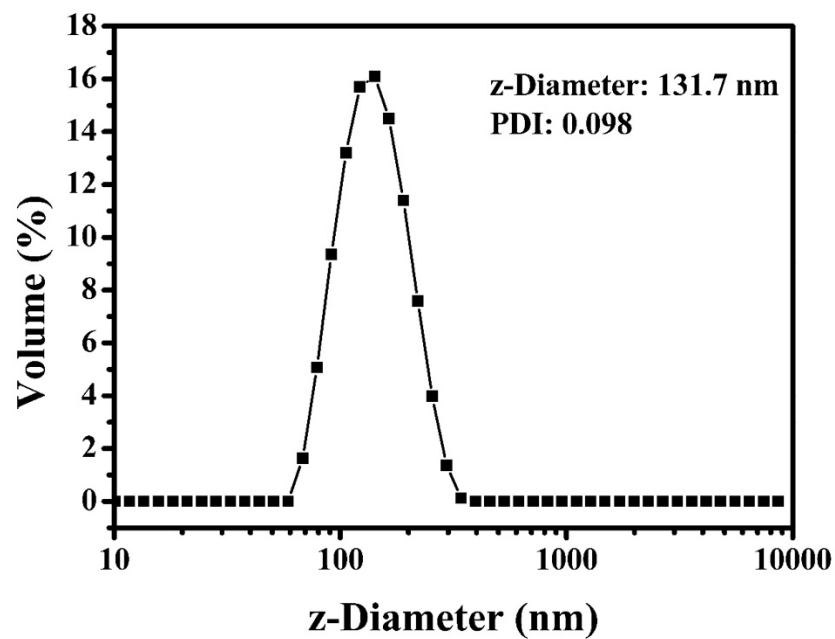

**Figure S6.** DLS size distribution of PSt-SiO<sub>2</sub> NCPs (see Table S1, run S5).

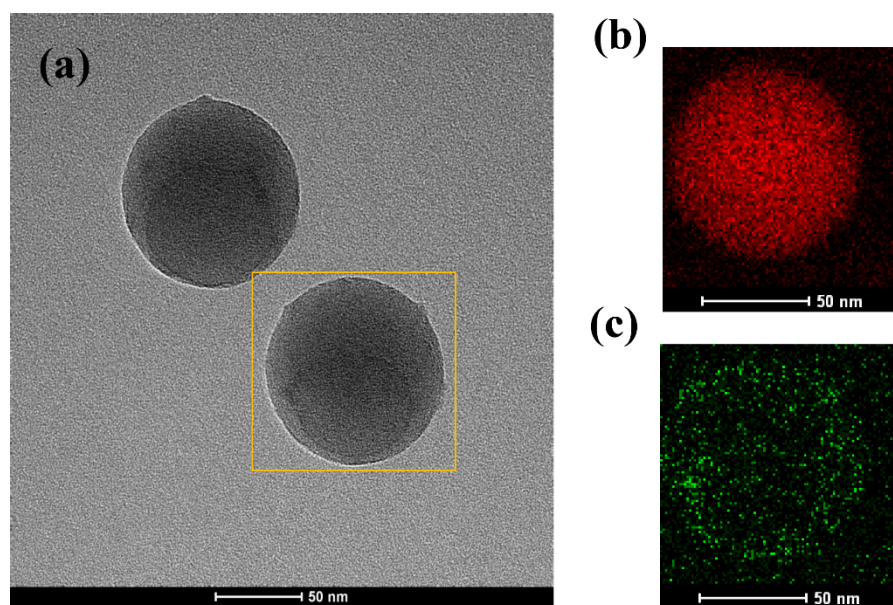

**Figure S7.** TEM micrograph (a) and EDX element mappings of C (b) and Si (c) of PSt-SiO<sub>2</sub> NCPs at a polymerization time of 5 h with an initial ratio of St/TEOS of 70/30 and 25 mg of 4-VP (Table 1, run 2).



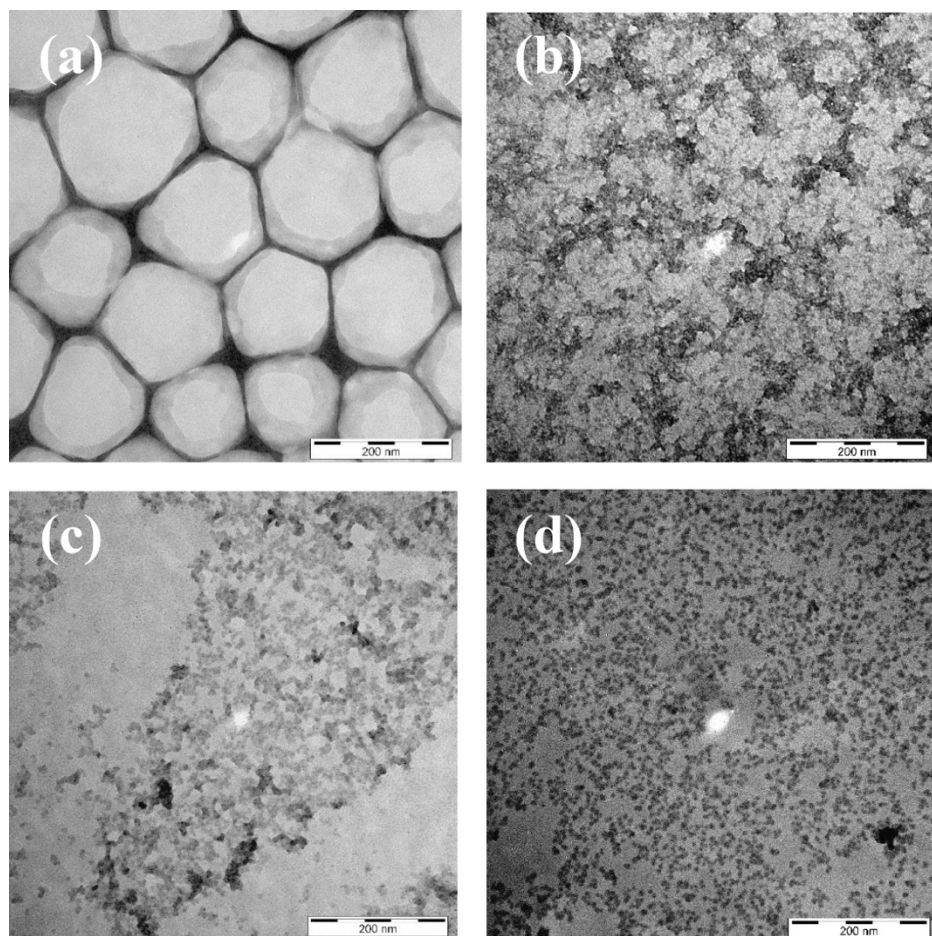

**Figure S8.** TEM images of SiO<sub>2</sub> particles after different times of the sol-gel process from emulsions with TEOS and toluene as dispersed phase: (a) 5 h, (b) 12 h, (c) 18 h and (d) 24 h.
